# Supplementary material
Source: PubMed Central journal article supplement (PMC6007111)
Supplement: supp_AEM.00071-18_aem00071-18_Supplemental_data.pdf [file supp_AEM.00071-18_aem00071-18_Supplemental_data.pdf]

## Supporting Material

### **Enzymatic synthesis of 6'-sialyllactose, a dominant sialylated human milk oligosaccharide, by a novel *exo- $\alpha$ -sialidase* from *Bacteroides fragilis* NCTC9343**

Longcheng Guo<sup>1#</sup>, Xiaodi Chen<sup>1#</sup>, Li Xu<sup>1</sup>, Min Xiao<sup>1\*</sup>, Lili Lu<sup>1,2\*</sup>

<sup>1</sup>*National Glycoengineering Research Center, State Key Lab of Microbial Technology, Shandong Provincial Key Laboratory of Carbohydrate Chemistry and Glycobiology, Shandong University, Jinan 250010, PR China.*

<sup>2</sup>*School of Pharmacy, Tongji Medical College, Huazhong University of Science and Technology, Wuhan 430030, PR China.*

<sup>#</sup>These authors contributed equally to this work.

\*Corresponding author. Tel./Fax: +86 531 88365128.

E-mail: minxiao@sdu.edu.cn (M. Xiao)

lililu@sdu.edu.cn (L. Lu) or lililu@hust.edu.cn (L. Lu).

Running title: Synthesis of 6'-sialyllactose by an *exo- $\alpha$ -sialidase*

## Table of Contents

|                                                                                                            |    |
|------------------------------------------------------------------------------------------------------------|----|
| 1. Table S1 Sequence analysis of seven <i>exo-α</i> -sialidases .....                                      | S3 |
| 2. Table S2 Kinetic parameters of BfGH33C with sialylated substrates .....                                 | S3 |
| 3. Fig. S1 SDS-PAGE analysis of the recombinant <i>exo-α</i> -sialidases purified from <i>E. coli</i> . .. | S4 |
| 4. Fig. S2 TLC and MS analysis of the oligosialic acid prepared from colominic acid .....                  | S4 |
| 5. Fig. S3 Gel filtration chromatography analysis of recombinant BfGH33C .....                             | S5 |
| 6. Fig. S4 Effects of pH and temperature on BfGH33C hydrolase activity and stability .....                 | S5 |
| 7. Fig. S5 Effect of metal ions and EDTA on the hydrolysis activity of BfGH33C .....                       | S6 |
| 8. Fig. S6 Analysis of transglycosylation reaction mixture of BfGH33C by TLC and HPAEC<br>.....            | S6 |
| 9. Fig. S7 ESI-MS spectra of [M-H] <sup>-</sup> ions of P <sub>Lac</sub> produced by BfGH33C .....         | S6 |
| 10. Fig. S8 Phylogenetic analysis of catalytic modules from 45 GH33 <i>exo-α</i> -sialidases .....         | S7 |

**Table S1** Sequence analysis of seven *exo- $\alpha$* -sialidases

| Enzyme source                   | Signal peptide <sup>a</sup><br>(Amino acid No.) | Transmembrane region <sup>b</sup><br>(Amino acid No.) |
|---------------------------------|-------------------------------------------------|-------------------------------------------------------|
| <i>B. fragilis</i> NCTC9343     |                                                 |                                                       |
| BfGH33A                         | 1-22                                            | 5-27                                                  |
| BfGH33B                         | N                                               | N                                                     |
| BfGH33C                         | 1-21                                            | N                                                     |
| <i>C. perfringens</i> ATCC13124 |                                                 |                                                       |
| CpGH33A                         | 1-26                                            | N                                                     |
| CpGH33B                         | N                                               | N                                                     |
| CpGH33C                         | N                                               | N                                                     |
| <i>B. bifidum</i> JCM1254       |                                                 |                                                       |
| SiaBb2                          | 1-35                                            | 13-35, 807-829                                        |

<sup>a</sup> Signal peptide was predicted using online tools (<http://www.cbs.dtu.dk/services/SignalP/>).

<sup>b</sup> Transmembrane region was predicted using online tools (<http://www.cbs.dtu.dk/services/TMHMM/>)

N, no signal peptide or transmembrane region.

**Table S2** Kinetic parameters of BfGH33C with sialylated substrates<sup>a</sup>

| Substrate         | V<br>( $\mu\text{mol}\cdot\text{min}^{-1}\cdot\text{mg}^{-1}$ ) | $K_m$<br>(mM)   | $k_{\text{cat}}$<br>( $\text{s}^{-1}$ ) | $k_{\text{cat}}/K_m$<br>( $\text{mM}^{-1}\cdot\text{s}^{-1}$ ) |
|-------------------|-----------------------------------------------------------------|-----------------|-----------------------------------------|----------------------------------------------------------------|
| 4MU-Neu5Ac        | 293.5 $\pm$ 10.5                                                | 0.06 $\pm$ 0.01 | 283.2                                   | 4857.3                                                         |
| Sialic acid dimer | 341.6 $\pm$ 9.3                                                 | 0.75 $\pm$ 0.07 | 329.6                                   | 438.0                                                          |

<sup>a</sup> The data represent triplicate experiments (for details, see materials and methods).

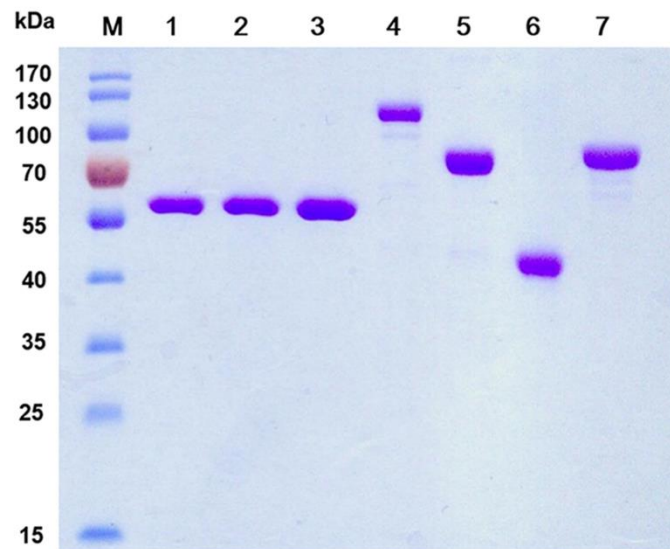

**Fig. S1** SDS-PAGE analysis of the recombinant *exo-α*-sialidases purified from *E. coli*. Lane M, marker proteins; lanes 1, 2, 3, 4, 5, 6, and 7 were purified enzyme BfGH33A, BfGH33B, BfGH33C, CpGH33A, CpGH33B, CpGH33C and SiaBb2, respectively.

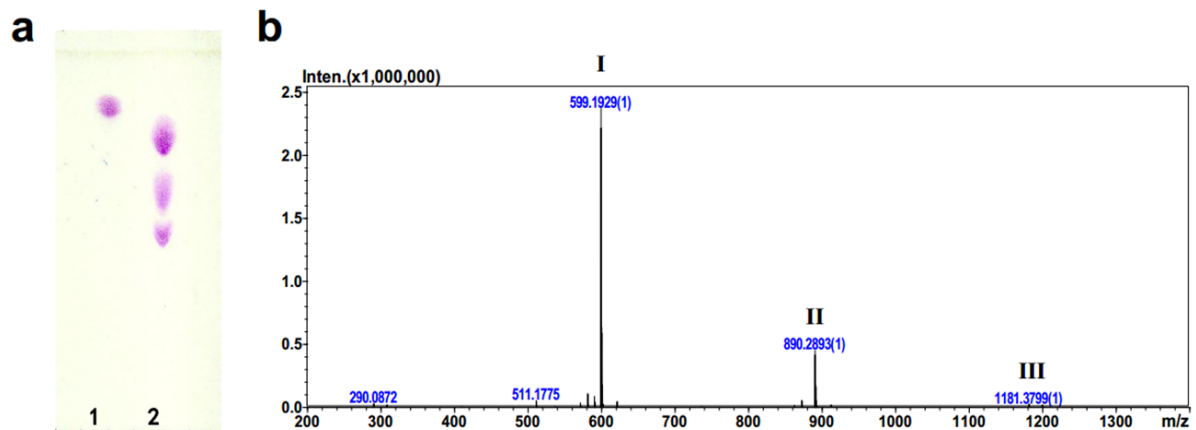

**Fig. S2** TLC (a) and MS (b) analysis of the oligosialic acid prepared from colominic acid. **a** Lane 1, the standard sialic acid. Lane 2, the oligosialic acid prepared from colominic acid. **b** I, sialic acid dimer ( $M_r$  600); II, sialic acid trimer ( $M_r$  891); III, sialic acid tetramer ( $M_r$  1182).

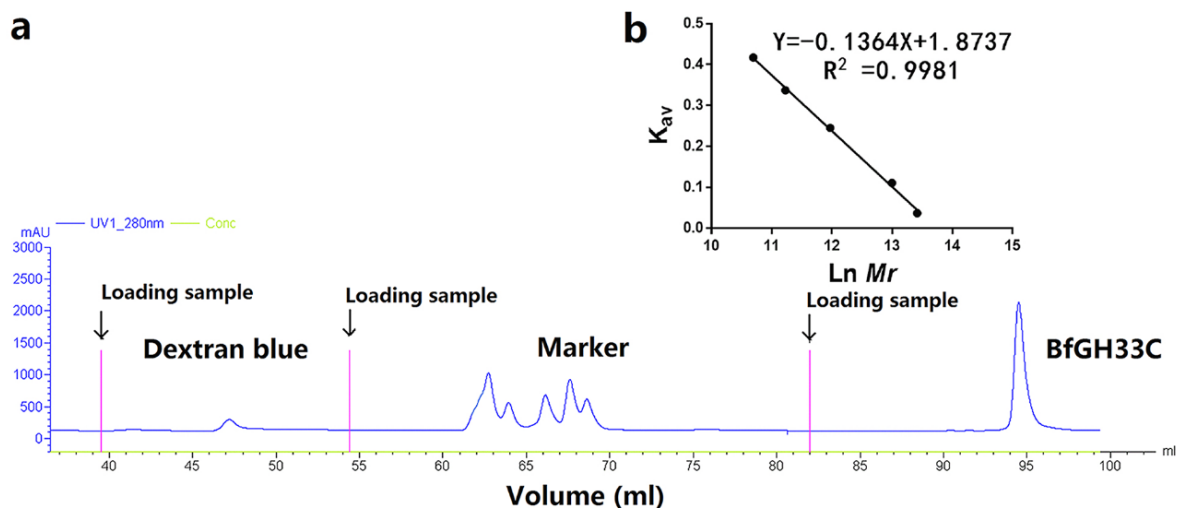

**Fig. S3** Gel filtration chromatography analysis of recombinant BfGH33C. **(a)** The elution patterns of dextran blue, marker proteins thyroglobulin (669 kDa), ferritin (440 kDa), aldolase (158 kDa), conalbumin (75 kDa), ovalbumin (44 kDa), and BfGH33C. The elution volumes of them were 7.7 ml, 8.3 ml, 9.5 ml, 11.7 ml, 13.2 ml, 14.5 ml, and 12.5 ml, respectively. The arrows represent the beginning of loading samples. **(b)** The marker standard curve based on the equation  $K_{av} = (V_e - V_o) / (V_c - V_o)$ .  $V_o$  and  $V_e$  represent the elution volumes of dextran blue and protein, respectively.  $V_c$  represents column volume (24 ml). The  $K_{av}$  of BfGH33C was calculated as 0.29, and its native molecular weight was about 113.6 kDa.

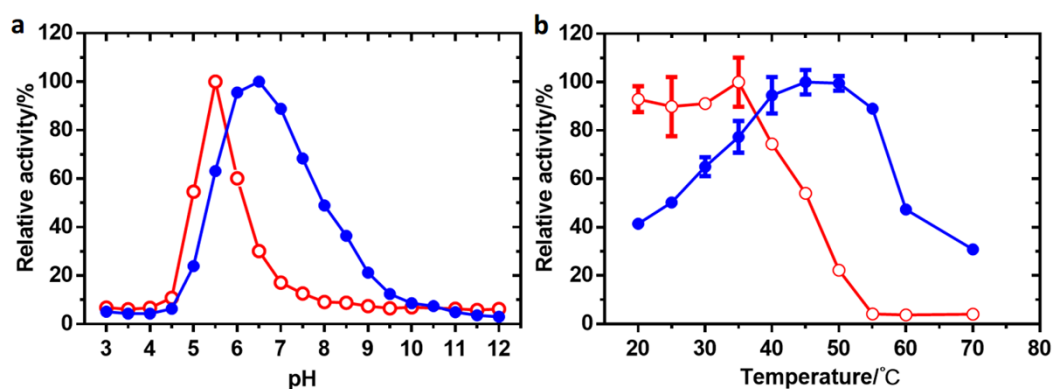

**Fig. S4** Effects of pH **(a)** and temperature **(b)** on BfGH33C hydrolase activity (●) and stability (○). Data points represent the means  $\pm$  SD of three replicates.

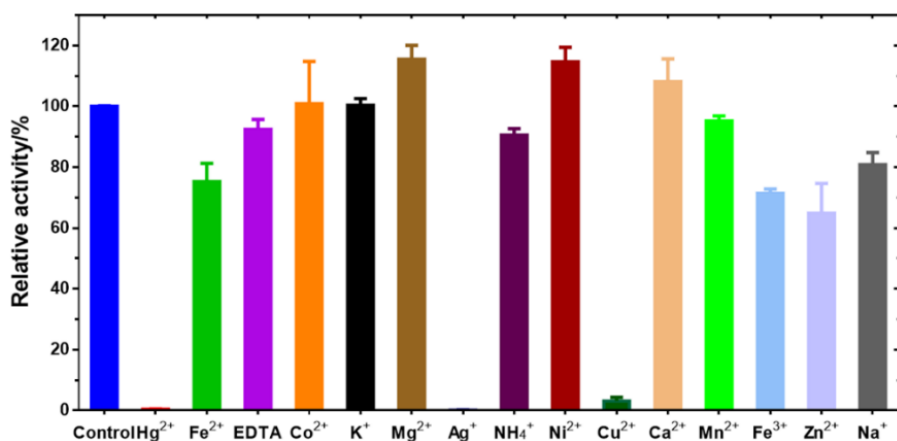

**Fig. S5** Effect of metal ions and EDTA on the hydrolysis activity of BfGH33C. Data points represent the means  $\pm$  SD of three replicates.

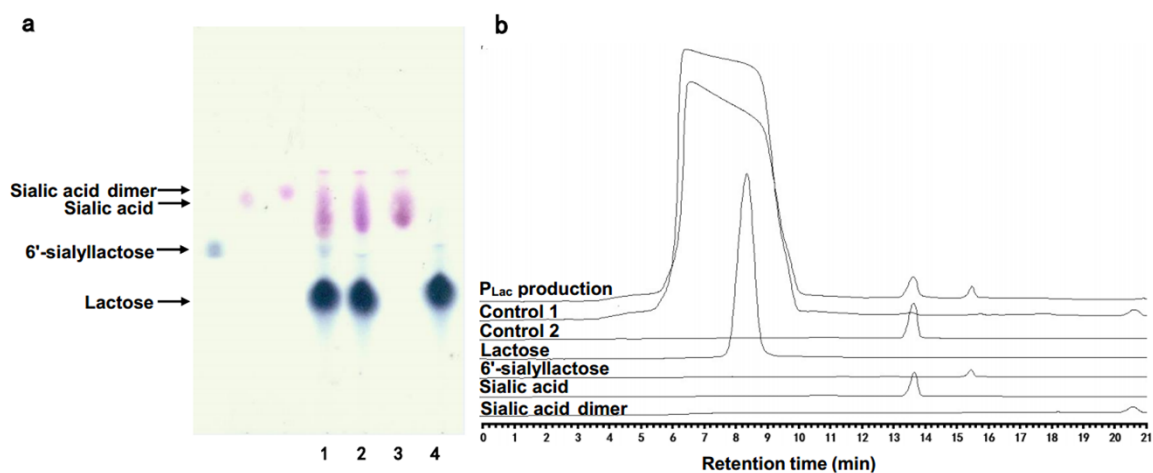

**Fig. S6** Analysis of transglycosylation reaction mixture of BfGH33C by TLC (a) and HPAEC (b). **a** Lane 1, reaction containing sialic acid dimer, lactose and BfGH33C; Lane 2, control reaction containing sialic acid dimer, lactose and inactivated BfGH33C; Lane 3, control reaction containing sialic acid dimer and BfGH33C; Lane 4, control reaction containing lactose and BfGH33C. **b** P<sub>Lac</sub> production, the same as lane 1 in (a); control 1, the same as lane 2 in (a); control 2, the same as lane 3 in (a).

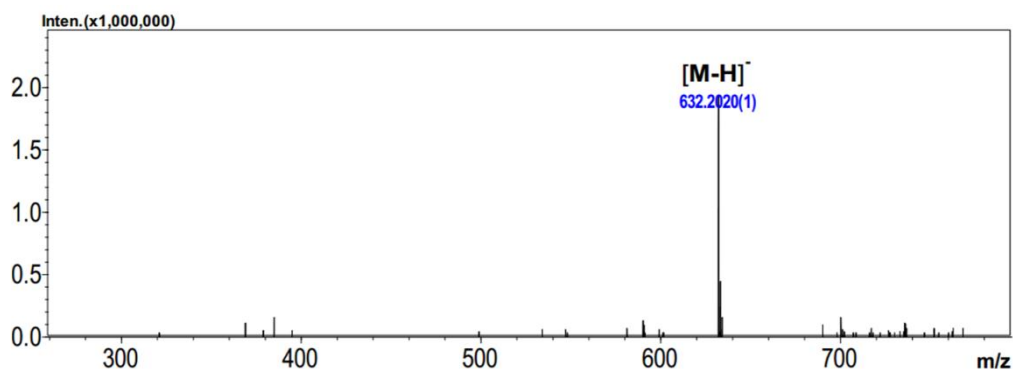

**Fig. S7** ESI-MS spectra of P<sub>Lac</sub> ( $M_r$  633) produced by BfGH33C.

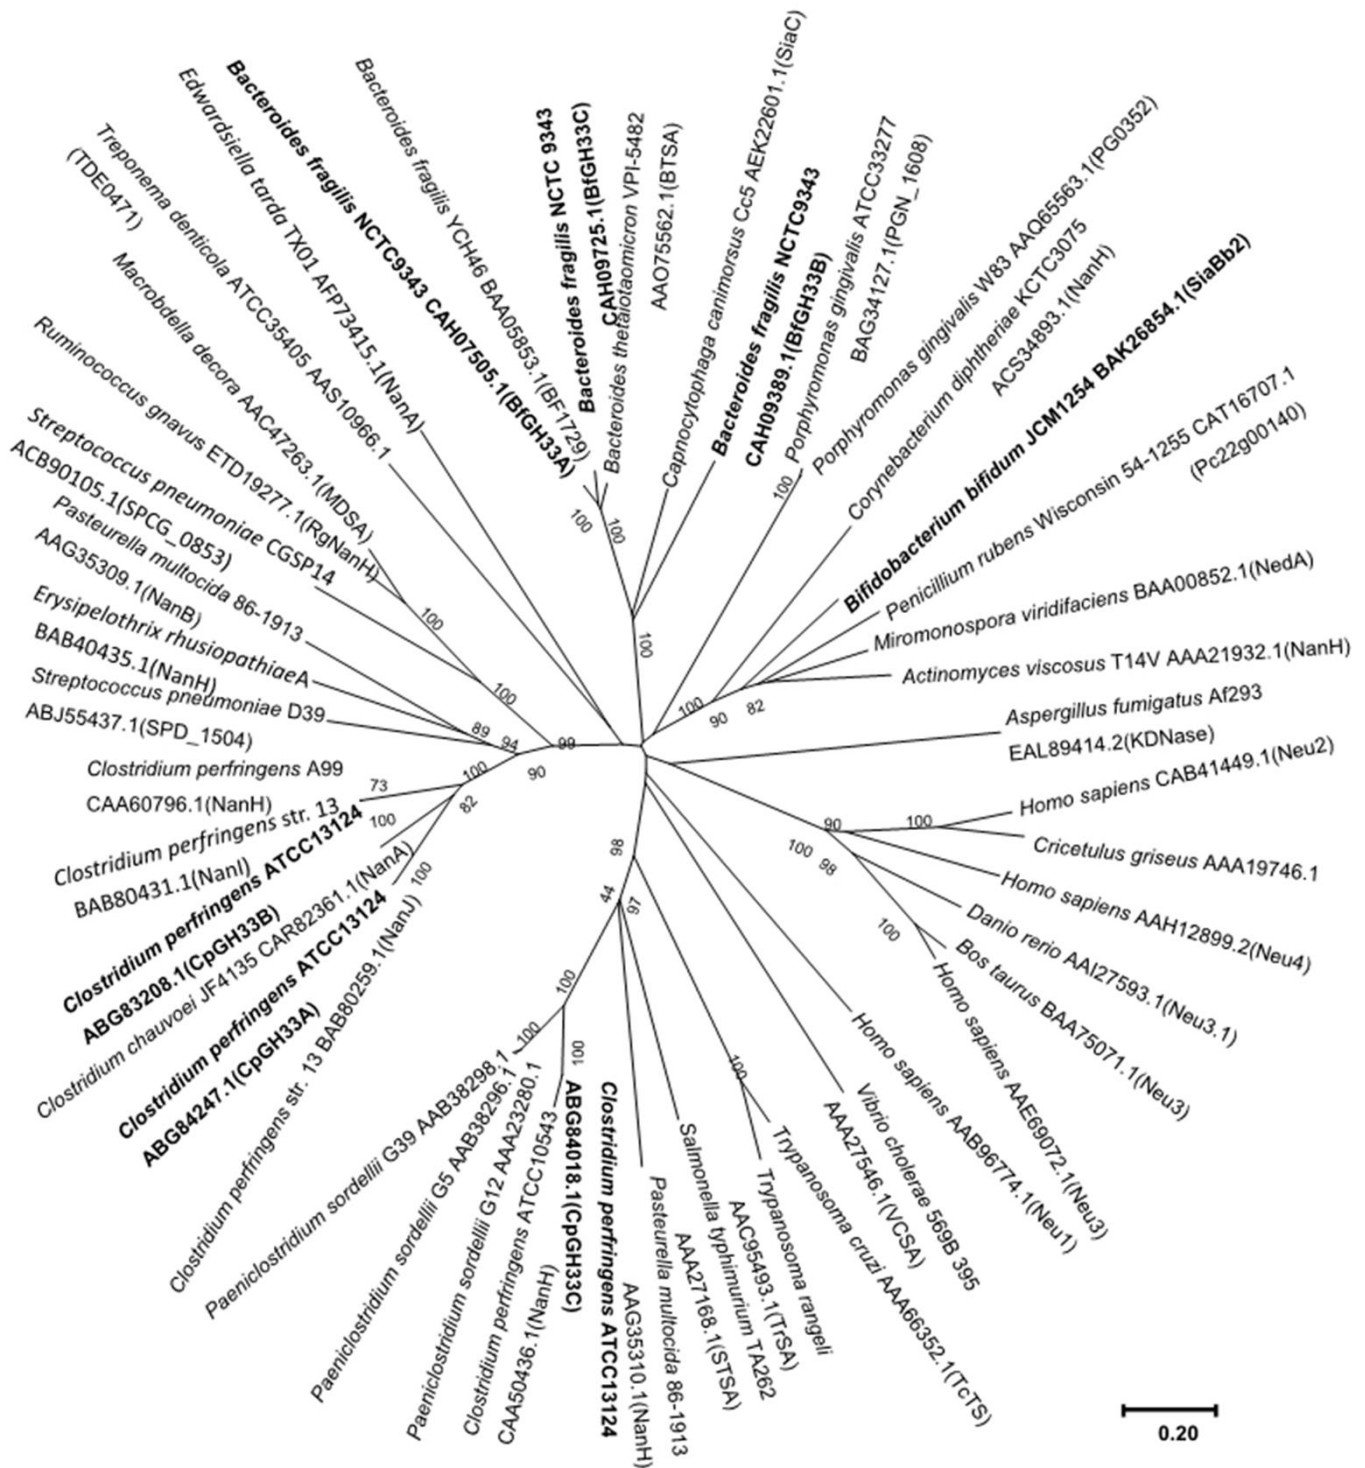

**Fig. S8** Phylogenetic analysis of catalytic modules from 45 GH33 *exo- $\alpha$* -sialidases. The domain analysis was predicted using online tools (<https://www.ncbi.nlm.nih.gov/Structure/cdd/wrpsb.cgi/>). The domain sequences of the *exo- $\alpha$* -sialidases were firstly subjected to the multiple alignments by the ClustalX 2.1 program and then converted to a phylogenetic tree by the MEGA7 program. The sequences from the enzymes BfGH33A, BfGH33B, BfGH33C, CpGH33A, CpGH33B, CpGH33C and SiaBb2 are highlighted in bold.
